# Supplementary material for: Rhodococcus Strains from the Specialized Collection of Alkanotrophs for Biodegradation of Aromatic Compounds
Source: MDPI journal article supplement (doi:10.3390/molecules28052393), 2023-03-05
Supplement: s1 [file s1]

Table S1 – *Rhodococcus* strains (<http://www.iegmc.ru>)

| Strain                  | Isolation source                                                                                  |
|-------------------------|---------------------------------------------------------------------------------------------------|
| <i>R. aetherivorans</i> |                                                                                                   |
| IEGM 1250               | Soil, Russia                                                                                      |
| <i>R. erythropolis</i>  |                                                                                                   |
| IEGM 190                | Water, the Ob river, Tyumen region, Russia                                                        |
| IEGM 201                | Water, spring, Olkhovski oil-extracting enterprise, Perm region, Russia                           |
| IEGM 202                | Water, spring, Yarino-Kamenolozhski oil-extracting enterprise, Perm region, Russia                |
| IEGM 203                | Water, observing hydro-geological well, Yurchuiski oil-extracting enterprise, Perm region, Russia |
| IEGM 204                | Water, observing hydro-geological well, Unvinski oil-extracting enterprise, Perm region, Russia   |
| IEGM 212                | Sewage, Kharbin, China                                                                            |
| IEGM 214                | Sewage, Kharbin, China                                                                            |
| IEGM 215                | Mineral water, Surgut district, Tyumen region, Russia                                             |
| IEGM 216                | Oil-polluted water, Kama river reservoir, Perm region, Russia                                     |
| IEGM 244                | Municipal wastewater, Harbin, China                                                               |
| IEGM 250                | Snow, Yakutia, Saha Republic, Russia                                                              |
| IEGM 251                | Snow, Yakutia, Saha Republic, Russia                                                              |
| IEGM 252                | Snow, Yakutia, Saha Republic, Russia                                                              |
| IEGM 265                | Oil-polluted water, oil-extracting enterprise, Perm region, Russia                                |
| IEGM 266                | Oil-polluted soil, oil-extracting enterprise, Perm krai, Russia                                   |
| IEGM 274                | Oil-polluted soil, oil-extracting enterprise, Perm region, Russia                                 |
| IEGM 658                | <i>Taraxacum officinale</i> rhizosphere, soil, highway, Novosibirsk, Novosibirsk region, Russia   |
| IEGM 659                | Soil, highway, Novosibirsk, Novosibirsk region, Russia                                            |
| IEGM 660                | Soil, highway, Novosibirsk, Novosibirsk region, Russia                                            |
| IEGM 661                | Virgin soil, Academgorodok, Novosibirsk, Novosibirsk region, Russia                               |
| IEGM 662                | Soil, Novosibirsk, Novosibirsk region, Russia                                                     |
| IEGM 695                | Water, oilfield area, Perm region, Russia                                                         |
| IEGM 784                | Soil, Novosibirsk, Novosibirsk region, Russia                                                     |
| IEGM 785                | Virgin soil, Academgorodok, Novosibirsk, Novosibirsk region, Russia                               |
| IEGM 786                | Soil, Novosibirsk, Novosibirsk region, Russia                                                     |
| IEGM 787                | Soil, Novosibirsk, Novosibirsk region, Russia                                                     |
| IEGM 788                | Oil-polluted soil, Novosibirsk region, Russia                                                     |
| IEGM 1017               | <i>Dactylis glomerata</i> rhizosphere, petrol station, Perm, Perm region, Russia                  |
| IEGM 1018               | <i>Tussilago farfara</i> rhizosphere, petrol station, Perm, Perm region, Russia                   |
| IEGM 1020               | Water, enterprise on production of paracetamol, Perm region, Russia                               |
| IEGM 1167               | <i>Polygonum aviculare</i> rhizosphere, petrol station, Perm, Perm region, Russia                 |
| IEGM 1180               | Soil, bank of the river Chernaya, Solikamsk, Perm region, Russia                                  |
| IEGM 1188               | Soil, to salt dump, Solikamsk, Perm region, Russia                                                |

Table S1 – *Rhodococcus* strains (<http://www.iegmc.ru>)

| Strain                       | Isolation source                                                                                                |
|------------------------------|-----------------------------------------------------------------------------------------------------------------|
| IEGM 1189                    | Water, Tyumen region, Russia                                                                                    |
| IEGM 1204                    | Soil, Yagel'nyy village, Tyumen region, Russia                                                                  |
| IEGM 1220                    | <i>Taraxacum officinale</i> rhizosphere, petrol station, Perm, Perm region, Russia                              |
| IEGM 1230                    | Oil-polluted soil, Perm region, Russia                                                                          |
| IEGM 1232                    | Oil-polluted soil, Perm region, Russia                                                                          |
| IEGM 1239                    | <i>Euphorbia virgata</i> rhizosphere, Kungurskiy district, Perm region, Russia                                  |
| IEGM 1268                    | Oil-polluted soil, Udmurt Republic, Russia                                                                      |
| IEGM 1353                    | Ni-contaminated soil, metallurgical enterprise area, Perm, Russia                                               |
| <i>R. qingshengii</i>        |                                                                                                                 |
| IEGM 247                     | Soil, lavsan polyethereal fibre production, open joint-stock company “Mogilevkhimvolokno”, Mogilev, Belarus     |
| IEGM 267                     | Oil-polluted soil oil-extracting enterprise, Perm krai, Russia                                                  |
| IEGM 699                     | Soil, oilfield outline zone, Perm region, Russia                                                                |
| IEGM 746                     | Oil-polluted soil, oil-extracting enterprise, Udmurt Republic, Russia                                           |
| IEGM 1262                    | Oil slime, Udmurt Republic, Russia                                                                              |
| IEGM 1270                    | Oil slime, Udmurt Republic, Russia                                                                              |
| IEGM 1359                    | Bottom sediment from lake systems, Li Smita Island, Franz Josef Land, Arkhangel'sk region, Russia               |
| <i>R. cerastii</i>           |                                                                                                                 |
| IEGM 1278                    | Oil-polluted soil after the remediation, Udmurt Republic, Russia                                                |
| <i>R. corynebacterioides</i> |                                                                                                                 |
| IEGM 931                     | Soil, <i>Arctium tomentosum</i> rhizosphere, petrol station, Perm, Russia                                       |
| IEGM 1202                    | coastal soil, the Goltsovoye Lake, the Mammoth Peninsula, Yamalo-Nenets Autonomous Okrug, Tyumen region, Russia |
| <i>R. fascians</i>           |                                                                                                                 |
| IEGM 281                     | Water, oil-extracting enterprise, Perm region, Russia                                                           |
| IEGM 930                     | <i>Artemisia vulgaris</i> rhizosphere, soil, petrol station, Perm, Russia                                       |
| IEGM 1072                    | <i>Artemisia vulgaris</i> rhizosphere, petrol station site, Perm, Perm region, Russia                           |
| IEGM 1158                    | <i>Achillea</i> rhizosphere, soil, former landfill area, Perm, Perm region, Russia                              |
| IEGM 1159                    | <i>Achillea</i> rhizosphere, soil, former landfill area, Perm, Perm region, Russia                              |
| IEGM 1168                    | <i>Artemisia vulgaris</i> rhizosphere, soil, petrol station, Perm, Perm region, Russia                          |
| IEGM 1213                    | Rhizosphere, soil, Sverdlovsk region, Russia                                                                    |
| IEGM 1216                    | Rhizosphere, soil, Sverdlovsk region, Russia                                                                    |
| IEGM 1218                    | Rhizosphere, soil, Stroganovskiy otval, Sverdlovsk region, Russia                                               |
| IEGM 1226                    | Water, Lys'venskiy's pound, Perm region, Russia                                                                 |
| IEGM 1233                    | <i>Elytrigia repens</i> rhizosphere, oilfield, Perm region, Russia                                              |
| IEGM 1235                    | <i>Elytrigia repens</i> rhizosphere, oilfield, Perm region, Russia                                              |
| <i>R. globerulus</i>         |                                                                                                                 |
| IEGM 1019                    | Soil, Belarus                                                                                                   |
| IEGM 1203                    | Soil, lake shore Gal'tsovoye, Tyumen region, Russia                                                             |

Table S1 – *Rhodococcus* strains (<http://www.iegmc.ru>)

| Strain                   | Isolation source                                                                                                                |
|--------------------------|---------------------------------------------------------------------------------------------------------------------------------|
| <i>R. jostii</i>         |                                                                                                                                 |
| IEGM 489                 | Active oil well, Belarus                                                                                                        |
| IEGM 1170                | <i>Taraxacum officinale</i> rhizosphere, gas-pipe area, Perm, Perm region, Russia                                               |
| IEGM 1193                | Oil-polluted soil, biological station, Solikamsk, Perm region, Russia                                                           |
| <i>R. opacus</i>         |                                                                                                                                 |
| IEGM 56                  | Soil, windbreak, Kherson region, Ukraine                                                                                        |
| IEGM 57                  | Oil-polluted soil, Ukraine                                                                                                      |
| IEGM 58                  | Soil, meadow, Dnepropetrovsk region, Ukraine                                                                                    |
| IEGM 59                  | No information                                                                                                                  |
| IEGM 246                 | Soil, lavsan (polyether fibre) production, Belarus                                                                              |
| IEGM 248                 | Soil, lavsan (polyether fibre) production, Belarus                                                                              |
| IEGM 249                 | Soil, lavsan (polyether fibre) production, Belarus                                                                              |
| IEGM 261                 | Soil, lavsan (polyether fibre) production, Belarus                                                                              |
| IEGM 262                 | Soil, lavsan (polyether fibre) production, Belarus                                                                              |
| IEGM 263                 | Soil, lavsan (polyether fibre) production, Belarus                                                                              |
| IEGM 264                 | Soil, lavsan (polyether fibre) production, Belarus                                                                              |
| IEGM 488                 | Oil-polluted water, Un'va river, Perm region, Russia                                                                            |
| IEGM 717                 | Soil, UK                                                                                                                        |
| IEGM 765                 | Oil-polluted soil, Perm region, Russia                                                                                          |
| IEGM 1157                | Soil, Perm, Perm krai, Russia                                                                                                   |
| IEGM 2226                | Oil-polluted soil, Perm region, Russia                                                                                          |
| <i>R. pyridinivorans</i> |                                                                                                                                 |
| IEGM 1137                | Oil-polluted soil, Solikamsk, Perm region, Russia                                                                               |
| IEGM 1227                | Water, Lys'venskiy's pound, Lys'va, Perm region, Russia                                                                         |
| <i>R. rhodochrous</i>    |                                                                                                                                 |
| IEGM 63                  | Oil-polluted soil, Ukraine                                                                                                      |
| IEGM 64                  | No information                                                                                                                  |
| IEGM 107                 | Water, the Dnieper river, Dnepropetrovsk region, Ukraine                                                                        |
| IEGM 646                 | Water, Berezniki, Perm krai, Russia                                                                                             |
| IEGM 757                 | Oil-polluted soil, Perm region, Russia                                                                                          |
| IEGM 1138                | Oil-polluted soil, Solikamsk, Perm region, Russia                                                                               |
| IEGM 1161                | <i>Atriplex</i> rhizosphere, soil, former landfill area, Perm, Perm region, Russia                                              |
| IEGM 1162                | <i>Atriplex</i> rhizosphere, soil, former landfill area, Perm, Perm region, Russia                                              |
| IEGM 1360                | Moss rhizosphere, soil near a stream at hydropost, bukhta Tikhaya, Gukera Island, Franz Josef Land, Arkhangel'sk region, Russia |
| IEGM 1362                | Peat, Pal'tinskoye peat deposit, Perm region, Russia                                                                            |
| IEGM 1363                | Oil-polluted soil, Udmurt Republic, Russia                                                                                      |
| <i>R. ruber</i>          |                                                                                                                                 |
| IEGM 90                  | Surface water reservoir, the Taimir peninsula, Krasnoyarsk region, Russia                                                       |
| IEGM 93                  | Sandy soil, Irkutsk region, Eastern Siberia, Russia                                                                             |
| IEGM 219                 | Water, the Upper Ilitch river, Russia                                                                                           |

Table S1 – *Rhodococcus* strains (<http://www.iegmc.ru>)

| Strain                    | Isolation source                                                                                 |
|---------------------------|--------------------------------------------------------------------------------------------------|
| IEGM 231                  | Water, spring, Olkhovski oil-extracting enterprise, Perm krai, Russia                            |
| IEGM 232                  | Soil, Polazna oil-extracting enterprise, Perm region, Russia                                     |
| IEGM 234                  | Snow, Polazna oil-extracting enterprise, Perm region, Russia                                     |
| IEGM 241                  | Chalk rock (depth 80 m), Gomel region, Belarus                                                   |
| IEGM 320                  | Mineral water, Surgut district, Tyumen district, Tyumen region, Russia                           |
| IEGM 321                  | Mineral water, Surgut district, Tyumen region, Russia                                            |
| IEGM 328                  | Water, well, oil-gas field, Perm krai, Russia                                                    |
| IEGM 334                  | Sand rock from the depth 6.0 m, Belarus                                                          |
| IEGM 337                  | Clay from the depth 18 m, Belarus                                                                |
| IEGM 1121                 | <i>Plantago</i> rhizosphere, soil, former landfill area, Perm, Perm region, Russia               |
| IEGM 1122                 | <i>Plantago major</i> rhizosphere, soil, former landfill area, Perm, Perm region, Russia         |
| IEGM 1124                 | <i>Atriplex</i> rhizosphere, soil, former landfill area, Perm, Perm region, Russia               |
| IEGM 1125                 | <i>Atriplex</i> rhizosphere, soil, former landfill area, Perm, Perm region, Russia               |
| IEGM 1126                 | Soil, <i>Atriplex</i> rhizosphere, public green space, Perm, Perm region, Russia                 |
| IEGM 1128                 | <i>Urtica dioica</i> rhizosphere, soil, gas-pipe area, Perm, Perm region, Russia                 |
| IEGM 1129                 | <i>Urtica dioica</i> rhizosphere, soil, gas-pipe area, Perm, Perm region, Russia                 |
| IEGM 1130                 | <i>Urtica dioica</i> rhizosphere, soil, gas-pipe area, Perm, Perm region, Russia                 |
| IEGM 1135                 | <i>Poa pratensis</i> rhizosphere, soil, highway to salt dump, Solikamsk, Perm region, Russia     |
| IEGM 1139                 | <i>Pimpinella saxifraga</i> rhizosphere, soil, lakeside, the Gdanski pen., Tyumen region, Russia |
| IEGM 1141                 | <i>Poa</i> rhizosphere, soil, Sverdlovsk region, Russia                                          |
| IEGM 1156                 | <i>Plantago</i> rhizosphere, former landfill area, Perm, Perm region, Russia                     |
| IEGM 1173                 | Silt, Suksun's pond, Suksun, Perm region, Russia                                                 |
| IEGM 1210                 | Rhizosphere, soil, Sverdlovsk region, Russia                                                     |
| IEGM 1211                 | Rhizosphere, soil, Pokrovskoye village, Sverdlovsk region, Russia                                |
| IEGM 1214                 | Rhizosphere, soil, Pokrovskoye village, Sverdlovsk region, Russia                                |
| IEGM 1215                 | Rhizosphere, soil, Korabel'nyy mys, Sverdlovsk region, Russia                                    |
| IEGM 1217                 | Rhizosphere, soil, Sverdlovsk region, Russia                                                     |
| IEGM 1219                 | Rhizosphere, soil, Sverdlovsk region, Russia                                                     |
| IEGM 1263                 | Oil-polluted waste, Sosnogorsk, Komi Republic, Russia                                            |
| IEGM 1352                 | Ni-contaminated soil, metallurgical enterprise area, Perm, Perm region, Russia                   |
| <i>R. wratislaviensis</i> |                                                                                                  |
| IEGM 1171                 | <i>Urtica dioica</i> rhizosphere, soil, petrol station, Perm, Perm region, Russia                |
| <i>R. yunnanensis</i>     |                                                                                                  |
| IEGM 1323                 | Soil, Hooker Island, Franz Josef Land, Arkhangel'sk region, Russia                               |

Table S2 – Growth of *Rhodococcus* strains in the presence of aromatic compounds

| Strain                  | Benzene            | Toluene            | <i>o</i> -Xylene   | Naphthalene   | Phenol        | Pyridine  |
|-------------------------|--------------------|--------------------|--------------------|---------------|---------------|-----------|
| <i>R. aetherivorans</i> |                    |                    |                    |               |               |           |
| IEGM 1250               | <b>Growth</b>      | <b>Growth</b>      | <b>Growth</b>      | ND            | ND            | No growth |
| <i>R. erythropolis</i>  |                    |                    |                    |               |               |           |
| IEGM 190                | No growth          | No growth          | No growth          | No growth     | <b>Growth</b> | ND        |
| IEGM 201                | No growth          | No growth          | No growth          | No growth     | <b>Growth</b> | ND        |
| IEGM 202                | No growth          | No growth          | No growth          | No growth     | No growth     | ND        |
| IEGM 203                | No growth          | No growth          | No growth          | No growth     | No growth     | ND        |
| IEGM 204                | No growth          | No growth          | No growth          | No growth     | No growth     | ND        |
| IEGM 212                | ND                 | ND                 | ND                 | Growth        | ND            | ND        |
| IEGM 214                | No growth          | No growth          | No growth          | No growth     | No growth     | ND        |
| IEGM 215                | No growth          | No growth          | No growth          | No growth     | No growth     | ND        |
| IEGM 216                | No growth          | No growth          | No growth          | No growth     | No growth     | ND        |
| IEGM 244                | No growth          | No growth          | No growth          | No growth     | No growth     | ND        |
| IEGM 250                | No growth          | No growth          | No growth          | No growth     | No growth     | ND        |
| IEGM 251                | No growth          | No growth          | No growth          | No growth     | No growth     | ND        |
| IEGM 252                | No growth          | No growth          | No growth          | No growth     | No growth     | ND        |
| IEGM 265                | No growth          | No growth          | No growth          | No growth     | <b>Growth</b> | ND        |
| IEGM 266                | ND                 | ND                 | ND                 | <b>Growth</b> | ND            | ND        |
| IEGM 274                | No growth          | No growth          | No growth          | No growth     | No growth     | ND        |
| IEGM 658                | ND                 | ND                 | <b>Growth</b>      | <b>Growth</b> | No growth     | ND        |
| IEGM 659                | ND                 | ND                 | <b>Growth</b>      | <b>Growth</b> | No growth     | ND        |
| IEGM 660                | ND                 | ND                 | No growth          | <b>Growth</b> | No growth     | ND        |
| IEGM 661                | ND                 | ND                 | No growth          | <b>Growth</b> | No growth     | ND        |
| IEGM 662                | ND                 | ND                 | No growth          | <b>Growth</b> | No growth     | ND        |
| IEGM 695                | No growth          | No growth          | <b>Growth</b>      | ND            | ND            | ND        |
| IEGM 784                | ND                 | ND                 | <b>Growth</b>      | <b>Growth</b> | No growth     | ND        |
| IEGM 785                | ND                 | ND                 | No growth          | <b>Growth</b> | No growth     | ND        |
| IEGM 786                | ND                 | ND                 | <b>Growth</b>      | <b>Growth</b> | No growth     | ND        |
| IEGM 787                | ND                 | ND                 | No growth          | <b>Growth</b> | No growth     | ND        |
| IEGM 788                | ND                 | ND                 | <b>Growth</b>      | <b>Growth</b> | <b>Growth</b> | ND        |
| IEGM 1017               | ND                 | ND                 | No growth          | No growth     | No growth     | ND        |
| IEGM 1018               | ND                 | ND                 | <b>Growth</b>      | <b>Growth</b> | No growth     | ND        |
| IEGM 1020               | No growth          | No growth          | <b>Growth</b>      | ND            | ND            | ND        |
| IEGM 1167               | ND                 | ND                 | <b>Growth</b>      | <b>Growth</b> | No growth     | ND        |
| IEGM 1180               | No growth          | No growth          | <b>Growth</b>      | ND            | ND            | ND        |
| IEGM 1188               | No growth          | No growth          | <b>Growth</b>      | ND            | ND            | ND        |
| IEGM 1189               | No growth          | <b>Growth</b>      | <b>Growth</b>      | ND            | ND            | No growth |
| IEGM 1204               | No growth          | No growth          | <b>Growth</b>      | ND            | ND            | ND        |
| IEGM 1220               | No growth          | No growth          | No growth          | <b>Growth</b> | No growth     | ND        |
| IEGM 1230               | Compromised growth | Compromised growth | <b>Growth</b>      | ND            | ND            | ND        |
| IEGM 1232               | <b>Growth</b>      | <b>Growth</b>      | <b>Growth</b>      | ND            | ND            | ND        |
| IEGM 1239               | No growth          | <b>Growth</b>      | <b>Growth</b>      | ND            | ND            | ND        |
| IEGM 1268               | No growth          | No growth          | <b>Growth</b>      | ND            | ND            | ND        |
| IEGM 1353               | ND                 | ND                 | Compromised growth | ND            | ND            | ND        |

Table S2 – Growth of *Rhodococcus* strains in the presence of aromatic compounds

| Strain                       | Benzene            | Toluene       | <i>o</i> -Xylene   | Naphthalene   | Phenol    | Pyridine  |
|------------------------------|--------------------|---------------|--------------------|---------------|-----------|-----------|
| <i>R. qingshengii</i>        |                    |               |                    |               |           |           |
| IEGM 247                     | Compromised growth | ND            | No growth          | ND            | ND        | ND        |
| IEGM 267                     | ND                 | ND            | Compromised growth | <b>Growth</b> | No growth | ND        |
| IEGM 699                     | No growth          | No growth     | Compromised growth | ND            | ND        | ND        |
| IEGM 746                     | No growth          | No growth     | <b>Growth</b>      | ND            | ND        | ND        |
| IEGM 1262                    | No growth          | <b>Growth</b> | <b>Growth</b>      | ND            | ND        | ND        |
| IEGM 1270                    | No growth          | No growth     | <b>Growth</b>      | <b>Growth</b> | No growth | ND        |
| IEGM 1359                    | <b>Growth</b>      | ND            | <b>Growth</b>      | ND            | ND        | No growth |
| <i>R. cerastii</i>           |                    |               |                    |               |           |           |
| IEGM 1278                    | No growth          | No growth     | <b>Growth</b>      | ND            | ND        | ND        |
| <i>R. corynebacterioides</i> |                    |               |                    |               |           |           |
| IEGM 931                     | <b>Growth</b>      | ND            | Compromised growth | No growth     | No growth | ND        |
| IEGM 1202                    | No growth          | ND            | <b>Growth</b>      | ND            | ND        | ND        |
| <i>R. fascians</i>           |                    |               |                    |               |           |           |
| IEGM 281                     | No growth          | No growth     | No growth          | No growth     | No growth | ND        |
| IEGM 930                     | No growth          | ND            | Compromised growth | No growth     | No growth | ND        |
| IEGM 1072                    | No growth          | ND            | Compromised growth | <b>Growth</b> | No growth | ND        |
| IEGM 1158                    | No growth          | ND            | <b>Growth</b>      | ND            | ND        | ND        |
| IEGM 1159                    | No growth          | ND            | <b>Growth</b>      | ND            | ND        | ND        |
| IEGM 1168                    | No growth          | ND            | Compromised growth | No growth     | No growth | ND        |
| IEGM 1213                    | No growth          | ND            | <b>Growth</b>      | ND            | ND        | ND        |
| IEGM 1216                    | No growth          | ND            | <b>Growth</b>      | ND            | ND        | ND        |
| IEGM 1218                    | No growth          | ND            | <b>Growth</b>      | ND            | ND        | ND        |
| IEGM 1226                    | No growth          | ND            | <b>Growth</b>      | ND            | ND        | ND        |
| IEGM 1233                    | <b>Growth</b>      | <b>Growth</b> | <b>Growth</b>      | ND            | ND        | ND        |
| IEGM 1235                    | No growth          | <b>Growth</b> | <b>Growth</b>      | ND            | ND        | ND        |
| <i>R. globerulus</i>         |                    |               |                    |               |           |           |
| IEGM 1019                    | No growth          | No growth     | Compromised growth | ND            | ND        | ND        |
| IEGM 1203                    | No growth          | No growth     | <b>Growth</b>      | ND            | ND        | ND        |
| <i>R. jostii</i>             |                    |               |                    |               |           |           |
| IEGM 489                     | No growth          | ND            | No growth          | ND            | ND        | ND        |
| IEGM 1170                    | ND                 | ND            | <b>Growth</b>      | <b>Growth</b> | No growth | ND        |
| IEGM 1193                    | No growth          | ND            | <b>Growth</b>      | ND            | ND        | No growth |
| <i>R. opacus</i>             |                    |               |                    |               |           |           |
| IEGM 56                      | Compromised growth | ND            | No growth          | ND            | ND        | ND        |
| IEGM 57                      | <b>Growth</b>      | ND            | No growth          | <b>Growth</b> | ND        | ND        |
| IEGM 58                      | No growth          | ND            | No growth          | ND            | ND        | ND        |
| IEGM 59                      | No growth          | ND            | No growth          | ND            | ND        | ND        |
| IEGM 246                     | No growth          | ND            | No growth          | ND            | ND        | ND        |

Table S2 – Growth of *Rhodococcus* strains in the presence of aromatic compounds

| Strain                   | Benzene            | Toluene            | <i>o</i> -Xylene   | Naphthalene   | Phenol             | Pyridine      |
|--------------------------|--------------------|--------------------|--------------------|---------------|--------------------|---------------|
| IEGM 248                 | No growth          | ND                 | No growth          | ND            | ND                 | ND            |
| IEGM 249                 | No growth          | ND                 | No growth          | <b>Growth</b> | ND                 | ND            |
| IEGM 261                 | No growth          | ND                 | No growth          | ND            | ND                 | ND            |
| IEGM 262                 | No growth          | ND                 | No growth          | ND            | ND                 | ND            |
| IEGM 263                 | No growth          | ND                 | No growth          | ND            | ND                 | ND            |
| IEGM 264                 | No growth          | ND                 | No growth          | ND            | ND                 | ND            |
| IEGM 488                 | No growth          | ND                 | No growth          | ND            | ND                 | ND            |
| IEGM 717                 | No growth          | ND                 | No growth          | ND            | ND                 | ND            |
| IEGM 765                 | No growth          | ND                 | No growth          | <b>Growth</b> | ND                 | ND            |
| IEGM 1157                | No growth          | ND                 | No growth          | ND            | No growth          | ND            |
| IEGM 2226                | <b>Growth</b>      | <b>Growth</b>      | No growth          | <b>Growth</b> | ND                 | ND            |
| <i>R. pyridinivorans</i> |                    |                    |                    |               |                    |               |
| IEGM 1137                | ND                 | ND                 | ND                 | ND            | ND                 | No growth     |
| IEGM 1227                | Compromised growth | Compromised growth | Compromised growth | No growth     | No growth          | ND            |
| <i>R. rhodochrous</i>    |                    |                    |                    |               |                    |               |
| IEGM 63                  | ND                 | ND                 | ND                 | <b>Growth</b> | ND                 | ND            |
| IEGM 64                  | ND                 | ND                 | ND                 | <b>Growth</b> | ND                 | ND            |
| IEGM 107                 | ND                 | ND                 | No growth          | ND            | ND                 | ND            |
| IEGM 646                 | ND                 | ND                 | ND                 | <b>Growth</b> | ND                 | ND            |
| IEGM 757                 | ND                 | ND                 | ND                 | ND            | ND                 | <b>Growth</b> |
| IEGM 1138                | <b>Growth</b>      | ND                 | <b>Growth</b>      | ND            | ND                 | No growth     |
| IEGM 1161                | ND                 | ND                 | No growth          | <b>Growth</b> | <b>Growth</b>      | ND            |
| IEGM 1162                | ND                 | ND                 | <b>Growth</b>      | <b>Growth</b> | <b>Growth</b>      | ND            |
| IEGM 1360                | <b>Growth</b>      | ND                 | ND                 | ND            | ND                 | ND            |
| IEGM 1362                | <b>Growth</b>      | ND                 | ND                 | ND            | ND                 | ND            |
| IEGM 1363                | <b>Growth</b>      | ND                 | ND                 | ND            | ND                 | ND            |
| <i>R. ruber</i>          |                    |                    |                    |               |                    |               |
| IEGM 90                  | No growth          | No growth          | No growth          | No growth     | No growth          | ND            |
| IEGM 93                  | No growth          | <b>Growth</b>      | No growth          | No growth     | No growth          | ND            |
| IEGM 219                 | ND                 | ND                 | ND                 | <b>Growth</b> | ND                 | ND            |
| IEGM 231                 | <b>Growth</b>      | <b>Growth</b>      | ND                 | ND            | ND                 | <b>Growth</b> |
| IEGM 232                 | No growth          | <b>Growth</b>      | No growth          | No growth     | No growth          | ND            |
| IEGM 234                 | No growth          | <b>Growth</b>      | No growth          | No growth     | No growth          | ND            |
| IEGM 241                 | ND                 | ND                 | ND                 | <b>Growth</b> | ND                 | ND            |
| IEGM 320                 | No growth          | No growth          | No growth          | No growth     | No growth          | ND            |
| IEGM 321                 | No growth          | No growth          | No growth          | No growth     | No growth          | ND            |
| IEGM 328                 | ND                 | ND                 | ND                 | <b>Growth</b> | ND                 | ND            |
| IEGM 334                 | No growth          | No growth          | No growth          | <b>Growth</b> | No growth          | ND            |
| IEGM 337                 | No growth          | No growth          | No growth          | No growth     | No growth          | ND            |
| IEGM 1121                | <b>Growth</b>      | <b>Growth</b>      | <b>Growth</b>      | <b>Growth</b> | Compromised growth | ND            |
| IEGM 1122                | Compromised growth | <b>Growth</b>      | <b>Growth</b>      | <b>Growth</b> | <b>Growth</b>      | ND            |
| IEGM 1124                | <b>Growth</b>      | <b>Growth</b>      | ND                 | <b>Growth</b> | No growth          | ND            |
| IEGM 1125                | Compromised growth | <b>Growth</b>      | <b>Growth</b>      | <b>Growth</b> | No growth          | ND            |

Table S2 – Growth of *Rhodococcus* strains in the presence of aromatic compounds

| Strain                    | Benzene            | Toluene       | <i>o</i> -Xylene   | Naphthalene   | Phenol             | Pyridine  |
|---------------------------|--------------------|---------------|--------------------|---------------|--------------------|-----------|
| IEGM 1126                 | Compromised growth | <b>Growth</b> | <b>Growth</b>      | <b>Growth</b> | No growth          | ND        |
| IEGM 1128                 | No growth          | ND            | <b>Growth</b>      | ND            | ND                 | ND        |
| IEGM 1129                 | Compromised growth | <b>Growth</b> | <b>Growth</b>      | <b>Growth</b> | No growth          | ND        |
| IEGM 1130                 | No growth          | ND            | <b>Growth</b>      | ND            | ND                 | ND        |
| IEGM 1135                 | No growth          | ND            | <b>Growth</b>      | ND            | ND                 | ND        |
| IEGM 1139                 | No growth          | ND            | <b>Growth</b>      | ND            | ND                 | ND        |
| IEGM 1141                 | No growth          | ND            | Compromised growth | ND            | ND                 | ND        |
| IEGM 1156                 | <b>Growth</b>      | <b>Growth</b> | <b>Growth</b>      | <b>Growth</b> | Compromised growth | ND        |
| IEGM 1173                 | No growth          | ND            | <b>Growth</b>      | <b>Growth</b> | No growth          | ND        |
| IEGM 1210                 | No growth          | ND            | <b>Growth</b>      | ND            | ND                 | ND        |
| IEGM 1211                 | No growth          | ND            | <b>Growth</b>      | ND            | ND                 | ND        |
| IEGM 1214                 | Compromised growth | ND            | <b>Growth</b>      | ND            | ND                 | ND        |
| IEGM 1215                 | No growth          | ND            | <b>Growth</b>      | ND            | ND                 | ND        |
| IEGM 1217                 | No growth          | ND            | <b>Growth</b>      | ND            | ND                 | ND        |
| IEGM 1219                 | No growth          | ND            | <b>Growth</b>      | ND            | ND                 | ND        |
| IEGM 1263                 | Compromised growth | ND            | <b>Growth</b>      | ND            | ND                 | No growth |
| IEGM 1352                 | ND                 | ND            | No growth          | ND            | ND                 | ND        |
| <i>R. wratislaviensis</i> |                    |               |                    |               |                    |           |
| IEGM 1171                 | No growth          | ND            | Compromised growth | <b>Growth</b> | No growth          | ND        |
| <i>R. yunnanensis</i>     |                    |               |                    |               |                    |           |
| IEGM 1323                 | ND                 | ND            | No growth          | ND            | ND                 | ND        |



Table S3 – Numbers of genes coded for putative enzymes of aromatic compound biodegradation by *Rhodococcus* spp. (a large set of genes is presented)

| Strain                                                  | <i>R. qing-shengii</i><br>IEGM<br>267 | <i>R. qing-shengii</i><br>IEGM<br>746 | <i>R. erythro-<br/>ropolis</i><br>IEGM<br>1189 | <i>R. qing-shengii</i><br>IEGM<br>1359 | <i>R. opacus</i><br>IEGM<br>249 | <i>R. pyridini-<br/>vorans</i><br>IEGM<br>1137 | <i>R. rhodo-<br/>chrous</i><br>IEGM<br>107 | <i>R. rhodo-<br/>chrous</i><br>IEGM<br>757 | <i>R. rhodo-<br/>chrous</i><br>IEGM<br>1360 | <i>R. ruber</i><br>IEGM 231                                                            |
|---------------------------------------------------------|---------------------------------------|---------------------------------------|------------------------------------------------|----------------------------------------|---------------------------------|------------------------------------------------|--------------------------------------------|--------------------------------------------|---------------------------------------------|----------------------------------------------------------------------------------------|
| Growth substrates                                       | <i>o</i> -Xylene,<br>PAHs             | <i>o</i> -Xylene                      | Toluene,<br><i>o</i> -xylene                   | Benzene,<br><i>o</i> -xylene           | Naph-<br>thalene                | -                                              | -                                          | Pyridine                                   | Benzene                                     | Benzene,<br>toluene,<br>PAHs, aniline,<br>pyridine and<br>its derivatives,<br>coumarin |
| Number of genes coded for                               |                                       |                                       |                                                |                                        |                                 |                                                |                                            |                                            |                                             |                                                                                        |
| Dioxygenases (total)                                    | 35                                    | 30                                    | 28                                             | 30                                     | 69                              | 23                                             | 32                                         | 41                                         | 32                                          | 46                                                                                     |
| catechol 1,2-<br>dioxygenases                           | 1                                     | 1                                     | 1                                              | 1                                      | 4                               | 1                                              | 2                                          | 3                                          | 2                                           | 2                                                                                      |
| catechol 2,3-<br>dioxygenases                           | 0                                     | 0                                     | 0                                              | 0                                      | 2                               | 1                                              | 0                                          | 0                                          | 0                                           | 1                                                                                      |
| protocatechuate 3,4-<br>dioxygenases                    | 1                                     | 1                                     | 1                                              | 1                                      | 1                               | 1                                              | 1                                          | 1                                          | 1                                           | 2                                                                                      |
| protocatechuate 4,5-<br>dioxygenases                    | 0                                     | 0                                     | 0                                              | 0                                      | 0                               | 0                                              | 0                                          | 0                                          | 0                                           | 0                                                                                      |
| homoprotocatechuate<br>2,3-dioxygenase                  | 0                                     | 0                                     | 0                                              | 0                                      | 0                               | 0                                              | 0                                          | 0                                          | 0                                           | 0                                                                                      |
| extradiol<br>dioxygenases                               | 2                                     | 2                                     | 2                                              | 2                                      | 2                               | 1                                              | 2                                          | 1                                          | 2                                           | 6                                                                                      |
| homogentisate 1,2-<br>dioxygenase                       | 1                                     | 2                                     | 1                                              | 2                                      | 1                               | 1                                              | 2                                          | 2                                          | 2                                           | 1                                                                                      |
| gentisate 1,2-<br>dioxygenase                           | 0                                     | 0                                     | 0                                              | 0                                      | 3                               | 0                                              | 1                                          | 2                                          | 1                                           | 1                                                                                      |
| benzene 1,2-<br>dioxygenase                             | 0                                     | 0                                     | 0                                              | 0                                      | 0                               | 0                                              | 0                                          | 0                                          | 0                                           | 1                                                                                      |
| hydroxyquinol 1,2-<br>dioxygenases                      | 0                                     | 0                                     | 0                                              | 0                                      | 0                               | 0                                              | 0                                          | 0                                          | 0                                           | 1                                                                                      |
| 2,3-dihydroxy- <i>p</i> -<br>cumate-3,4-<br>dioxygenase | 0                                     | 0                                     | 0                                              | 0                                      | 0                               | 0                                              | 0                                          | 0                                          | 0                                           | 0                                                                                      |
| 2,4,5-<br>trihydroxytoluene<br>dioxygenase              | 0                                     | 0                                     | 0                                              | 0                                      | 0                               | 0                                              | 0                                          | 0                                          | 0                                           | 0                                                                                      |
| gallate 4,5-<br>dioxygenase                             | 0                                     | 0                                     | 0                                              | 0                                      | 0                               | 0                                              | 0                                          | 0                                          | 0                                           | 0                                                                                      |
| 2,3-dihydroxyphenyl<br>propionate 1,2-<br>dioxygenase   | 0                                     | 0                                     | 0                                              | 0                                      | 0                               | 0                                              | 0                                          | 0                                          | 0                                           | 0                                                                                      |
| hydroquinone 1,2-<br>dioxygenase                        | 0                                     | 0                                     | 0                                              | 0                                      | 0                               | 0                                              | 0                                          | 0                                          | 0                                           | 0                                                                                      |
| 3-hydroxyanthranilate<br>3,4-dioxygenase                | 1                                     | 1                                     | 1                                              | 1                                      | 0                               | 0                                              | 0                                          | 0                                          | 0                                           | 0                                                                                      |
| naphthalene<br>dioxygenase                              | 0                                     | 0                                     | 0                                              | 0                                      | 0                               | 0                                              | 0                                          | 0                                          | 0                                           | 0                                                                                      |
| aniline dioxygenases                                    | 0                                     | 0                                     | 0                                              | 0                                      | 0                               | 0                                              | 0                                          | 0                                          | 0                                           | 0                                                                                      |
| 2-aminophenol 1,6-<br>dioxygenase                       | 0                                     | 0                                     | 0                                              | 0                                      | 0                               | 0                                              | 0                                          | 0                                          | 0                                           | 0                                                                                      |

Table S3 – Numbers of genes coded for putative enzymes of aromatic compound biodegradation by *Rhodococcus* spp. (a large set of genes is presented)

| Strain                                               | <i>R. qing-shengii</i><br>IEGM<br>267 | <i>R. qing-shengii</i><br>IEGM<br>746 | <i>R. erythropolis</i><br>IEGM<br>1189 | <i>R. qing-shengii</i><br>IEGM<br>1359 | <i>R. opacus</i><br>IEGM<br>249 | <i>R. pyridinivorans</i><br>IEGM<br>1137 | <i>R. rhodochrous</i><br>IEGM<br>107 | <i>R. rhodochrous</i><br>IEGM<br>757 | <i>R. rhodochrous</i><br>IEGM<br>1360 | <i>R. ruber</i><br>IEGM 231                                             |
|------------------------------------------------------|---------------------------------------|---------------------------------------|----------------------------------------|----------------------------------------|---------------------------------|------------------------------------------|--------------------------------------|--------------------------------------|---------------------------------------|-------------------------------------------------------------------------|
| Growth substrates                                    | <i>o</i> -Xylene, PAHs                | <i>o</i> -Xylene                      | Toluene, <i>o</i> -xylene              | Benzene, <i>o</i> -xylene              | Naphthalene                     | -                                        | -                                    | Pyridine                             | Benzene                               | Benzene, toluene, PAHs, aniline, pyridine and its derivatives, coumarin |
| Number of genes coded for                            |                                       |                                       |                                        |                                        |                                 |                                          |                                      |                                      |                                       |                                                                         |
| 2,5-dihydroxypyridine 5,6-dioxygenases               | 0                                     | 0                                     | 0                                      | 0                                      | 0                               | 0                                        | 0                                    | 0                                    | 0                                     | 0                                                                       |
| phthalate 3,4-dioxygenase                            | 0                                     | 0                                     | 0                                      | 0                                      | 1                               | 0                                        | 0                                    | 0                                    | 0                                     | 0                                                                       |
| terephthalate 1,2-dioxygenase                        | 0                                     | 0                                     | 0                                      | 0                                      | 0                               | 0                                        | 0                                    | 0                                    | 0                                     | 0                                                                       |
| isophthalate 3,4-dioxygenase                         | 0                                     | 0                                     | 0                                      | 0                                      | 0                               | 0                                        | 0                                    | 0                                    | 0                                     | 0                                                                       |
| anthranilate 1,2-dioxygenase reductase               | 1                                     | 1                                     | 1                                      | 1                                      | 1                               | 0                                        | 0                                    | 0                                    | 0                                     | 1                                                                       |
| 3-hydroxyanthranilate 3,4-dioxygenase (EC 1.13.11.6) | 1                                     | 1                                     | 1                                      | 1                                      | 0                               | 0                                        | 0                                    | 0                                    | 0                                     | 0                                                                       |
| benzoate 1,2-dioxygenase                             | 1                                     | 1                                     | 0                                      | 0                                      | 4                               | 1                                        | 2                                    | 2                                    | 2                                     | 1                                                                       |
| biphenyl 2,3-dioxygenase                             | 0                                     | 0                                     | 0                                      | 0                                      | 0                               | 0                                        | 0                                    | 0                                    | 0                                     | 1                                                                       |
| indole 3-acetate dioxygenase                         | 0                                     | 0                                     | 0                                      | 0                                      | 0                               | 0                                        | 0                                    | 0                                    | 0                                     | 0                                                                       |
| <i>p</i> -cumate 2,3-dioxygenase                     | 0                                     | 0                                     | 0                                      | 0                                      | 0                               | 0                                        | 0                                    | 0                                    | 0                                     | 0                                                                       |
| 4-hydroxyphenyl pyruvate dioxygenase                 | 2                                     | 2                                     | 2                                      | 2                                      | 4                               | 2                                        | 3                                    | 3                                    | 3                                     | 2                                                                       |
| 2,4'-dihydroxy acetophenone dioxygenase              | 0                                     | 0                                     | 0                                      | 0                                      | 0                               | 0                                        | 0                                    | 0                                    | 0                                     | 0                                                                       |
| Monooxygenases (total)                               | 66                                    | 66                                    | 66                                     | 66                                     | 97                              | 45                                       | 63                                   | 74                                   | 63                                    | 72                                                                      |
| flavin-binding monooxygenases                        | 4                                     | 3                                     | 3                                      | 2                                      | 3                               | 2                                        | 3                                    | 4                                    | 3                                     | 0                                                                       |
| benzene/ toluene monooxygenase                       | 0                                     | 0                                     | 0                                      | 0                                      | 0                               | 0                                        | 0                                    | 0                                    | 0                                     | 0                                                                       |
| phenol monooxygenase                                 | 0                                     | 0                                     | 0                                      | 0                                      | 0                               | 0                                        | 0                                    | 0                                    | 0                                     | 3                                                                       |
| benzoyl-CoA oxygenases/ reductases                   | 0                                     | 0                                     | 0                                      | 0                                      | 1                               | 0                                        | 1                                    | 0                                    | 1                                     | 0                                                                       |

Table S3 – Numbers of genes coded for putative enzymes of aromatic compound biodegradation by *Rhodococcus* spp. (a large set of genes is presented)

| Strain                                                                                                      | <i>R. qing-shengii</i><br>IEGM<br>267 | <i>R. qing-shengii</i><br>IEGM<br>746 | <i>R. eryth-ropolis</i><br>IEGM<br>1189 | <i>R. qing-shengii</i><br>IEGM<br>1359 | <i>R. opacus</i><br>IEGM<br>249 | <i>R. pyridini-vorans</i><br>IEGM<br>1137 | <i>R. rhodo-chrous</i><br>IEGM<br>107 | <i>R. rhodo-chrous</i><br>IEGM<br>757 | <i>R. rhodo-chrous</i><br>IEGM<br>1360 | <i>R. ruber</i><br>IEGM 231                                             |
|-------------------------------------------------------------------------------------------------------------|---------------------------------------|---------------------------------------|-----------------------------------------|----------------------------------------|---------------------------------|-------------------------------------------|---------------------------------------|---------------------------------------|----------------------------------------|-------------------------------------------------------------------------|
| Growth substrates                                                                                           | <i>o</i> -Xylene, PAHs                | <i>o</i> -Xylene                      | Toluene, <i>o</i> -xylene               | Benzene, <i>o</i> -xylene              | Naphthalene                     | -                                         | -                                     | Pyridine                              | Benzene                                | Benzene, toluene, PAHs, aniline, pyridine and its derivatives, coumarin |
| Number of genes coded for                                                                                   |                                       |                                       |                                         |                                        |                                 |                                           |                                       |                                       |                                        |                                                                         |
| phenylacetyl-CoA oxygenases/reductases, or 1,2-phenylacetyl-CoA epoxidases PaaE/PaaJ/ PaaK (EC 1.14.13.149) | 1                                     | 1                                     | 1                                       | 1                                      | 0                               | 0                                         | 0                                     | 0                                     | 0                                      | 0                                                                       |
| 4-hydroxybenzoate 3-hydroxylase                                                                             | 1                                     | 1                                     | 1                                       | 1                                      | 4                               | 2                                         | 3                                     | 3                                     | 3                                      | 1                                                                       |
| 3-hydroxybenzoate 4-hydroxylase                                                                             | 0                                     | 0                                     | 0                                       | 0                                      | 0                               | 0                                         | 0                                     | 0                                     | 0                                      | 0                                                                       |
| 3-hydroxybenzoate 6-hydroxylase                                                                             | 0                                     | 0                                     | 0                                       | 0                                      | 0                               | 0                                         | 0                                     | 0                                     | 0                                      | 1                                                                       |
| salicylate 1-hydroxylase                                                                                    | 0                                     | 0                                     | 1                                       | 1                                      | 0                               | 0                                         | 1                                     | 0                                     | 1                                      | 0                                                                       |
| salicylate-5-hydroxylase                                                                                    | 0                                     | 0                                     | 0                                       | 0                                      | 0                               | 0                                         | 0                                     | 0                                     | 0                                      | 0                                                                       |
| 3-hydroxyphenyl propionate 2-hydroxylase                                                                    | 0                                     | 0                                     | 0                                       | 0                                      | 0                               | 0                                         | 0                                     | 0                                     | 0                                      | 0                                                                       |
| 3-hydroxyphenyl acetate 6-hydroxylase                                                                       | 0                                     | 0                                     | 0                                       | 0                                      | 0                               | 0                                         | 0                                     | 0                                     | 0                                      | 0                                                                       |
| 4-hydroxyphenyl acetate 3-hydroxylase                                                                       | 1                                     | 1                                     | 1                                       | 1                                      | 7                               | 2                                         | 1                                     | 1                                     | 1                                      | 0                                                                       |
| resorcinol 4-hydroxylase                                                                                    | 0                                     | 0                                     | 0                                       | 0                                      | 0                               | 0                                         | 0                                     | 0                                     | 0                                      | 0                                                                       |
| <i>p</i> -cresol methylhydroxylase                                                                          | 0                                     | 0                                     | 0                                       | 0                                      | 0                               | 0                                         | 0                                     | 0                                     | 0                                      | 0                                                                       |
| 2-aminobenzoyl-CoA monooxygenase/reductase                                                                  | 0                                     | 0                                     | 0                                       | 0                                      | 0                               | 0                                         | 0                                     | 0                                     | 0                                      | 0                                                                       |
| 3-(3-hydroxy-phenyl)propionate hydroxylase                                                                  | 0                                     | 0                                     | 0                                       | 0                                      | 0                               | 0                                         | 0                                     | 0                                     | 0                                      | 0                                                                       |
| 6-hydroxynicotinate 3-monooxygenase                                                                         | 0                                     | 0                                     | 0                                       | 0                                      | 0                               | 0                                         | 0                                     | 0                                     | 0                                      | 0                                                                       |
| Multicopper polyphenol oxidases                                                                             | 1                                     | 1                                     | 1                                       | 1                                      | 1                               | 1                                         | 1                                     | 1                                     | 1                                      | 4                                                                       |

Table S3 – Numbers of genes coded for putative enzymes of aromatic compound biodegradation by *Rhodococcus* spp. (a large set of genes is presented)

| Strain                                           | <i>R. qing-shengii</i><br>IEGM<br>267 | <i>R. qing-shengii</i><br>IEGM<br>746 | <i>R. eryth-ropolis</i><br>IEGM<br>1189 | <i>R. qing-shengii</i><br>IEGM<br>1359 | <i>R. opacus</i><br>IEGM<br>249 | <i>R. pyridini-vorans</i><br>IEGM<br>1137 | <i>R. rhodo-chrous</i><br>IEGM<br>107 | <i>R. rhodo-chrous</i><br>IEGM<br>757 | <i>R. rhodo-chrous</i><br>IEGM<br>1360 | <i>R. ruber</i><br>IEGM 231                                             |
|--------------------------------------------------|---------------------------------------|---------------------------------------|-----------------------------------------|----------------------------------------|---------------------------------|-------------------------------------------|---------------------------------------|---------------------------------------|----------------------------------------|-------------------------------------------------------------------------|
| Growth substrates                                | <i>o</i> -Xylene, PAHs                | <i>o</i> -Xylene                      | Toluene, <i>o</i> -xylene               | Benzene, <i>o</i> -xylene              | Naphthalene                     | -                                         | -                                     | Pyridine                              | Benzene                                | Benzene, toluene, PAHs, aniline, pyridine and its derivatives, coumarin |
| Number of genes coded for                        |                                       |                                       |                                         |                                        |                                 |                                           |                                       |                                       |                                        |                                                                         |
| Dehydrogenases (total)                           | 387                                   | 367                                   | 350                                     | 348                                    | 731                             | 256                                       | 352                                   | 429                                   | 348                                    | 288                                                                     |
| nicotinate dehydrogenase                         | 0                                     | 0                                     | 0                                       | 0                                      | 0                               | 0                                         | 0                                     | 0                                     | 0                                      | 0                                                                       |
| aldehyde dehydrogenase                           | 13                                    | 13                                    | 11                                      | 12                                     | 41                              | 6                                         | 15                                    | 20                                    | 15                                     | 5                                                                       |
| succinate-semialdehyde dehydrogenase             | 1                                     | 1                                     | 1                                       | 1                                      | 5                               | 1                                         | 1                                     | 0                                     | 1                                      | 1                                                                       |
| 3,4-dihydroxy-3,4-dihydrophthalate dehydrogenase | 0                                     | 0                                     | 0                                       | 0                                      | 0                               | 0                                         | 0                                     | 0                                     | 0                                      | 0                                                                       |
| 4,5-dihydro-4,5-dihydroxyphthalate dehydrogenase | 0                                     | 0                                     | 0                                       | 0                                      | 0                               | 0                                         | 0                                     | 0                                     | 0                                      | 0                                                                       |
| Hydrolases                                       | 125                                   | 116                                   | 116                                     | 116                                    | 229                             | 96                                        | 115                                   | 133                                   | 115                                    | 123                                                                     |
| phenol hydrolase                                 | 0                                     | 0                                     | 0                                       | 0                                      | 1                               | 1                                         | 0                                     | 0                                     | 0                                      | 0                                                                       |
| N-formylmaleamate deformylase                    | 0                                     | 0                                     | 0                                       | 0                                      | 0                               | 0                                         | 0                                     | 0                                     | 0                                      | 0                                                                       |
| maleamate amidohydrolase                         | 0                                     | 0                                     | 0                                       | 0                                      | 0                               | 0                                         | 0                                     | 0                                     | 0                                      | 1                                                                       |
| amidase                                          | 2                                     | 2                                     | 2                                       | 2                                      | 2                               | 0                                         | 0                                     | 0                                     | 0                                      | 3                                                                       |
| formamidase                                      | 1                                     | 1                                     | 1                                       | 1                                      | 1                               | 1                                         | 1                                     | 1                                     | 1                                      | 0                                                                       |
| fumarylacetoacetate hydrolase family             | 1                                     | 1                                     | 0                                       | 1                                      | 6                               | 0                                         | 2                                     | 2                                     | 2                                      | 0                                                                       |
| hydroxymuconic semialdehyde hydrolase            | 3                                     | 2                                     | 2                                       | 2                                      | 0                               | 1                                         | 2                                     | 2                                     | 2                                      | 1                                                                       |
| vanillate 3-O demethylase                        | 4                                     | 2                                     | 2                                       | 4                                      | 20                              | 4                                         | 7                                     | 8                                     | 7                                      | 5                                                                       |
| isovanillate 4-O demethylase                     | 0                                     | 0                                     | 0                                       | 0                                      | 0                               | 0                                         | 0                                     | 0                                     | 0                                      | 0                                                                       |
| Maleate isomerase                                | 0                                     | 0                                     | 1                                       | 0                                      | 2                               | 0                                         | 0                                     | 0                                     | 0                                      | 0                                                                       |
| Catalases                                        | 4                                     | 3                                     | 3                                       | 4                                      | 8                               | 4                                         | 5                                     | 4                                     | 5                                      | 3                                                                       |
| Lipases                                          | 27                                    | 21                                    | 24                                      | 20                                     | 31                              | 12                                        | 21                                    | 23                                    | 21                                     | 22                                                                      |
| Nitrate reductase                                | 1                                     | 1                                     | 1                                       | 1                                      | 3                               | 3                                         | 3                                     | 4                                     | 3                                      | 3                                                                       |
| Nitrite reductase                                | 1                                     | 1                                     | 1                                       | 1                                      | 2                               | 1                                         | 1                                     | 1                                     | 1                                      | 3                                                                       |
| 4,5-Dihydroxyphthalate decarboxylase             | 0                                     | 0                                     | 0                                       | 0                                      | 0                               | 0                                         | 0                                     | 0                                     | 0                                      | 0                                                                       |
